# Supplementary material
Source: publisher figshare collection journal article supplement (https://sage.figshare.com/ndownloader/files/14375981)
Supplement: Supplementary file 1 [file 14375981]

**Table S1** Demographic and clinical characteristics of women with preterm premature rupture of membrane involved in the exploratory cohort study

|                                           | Histologic chorioamnionitis |                  | <i>P</i> -value |
|-------------------------------------------|-----------------------------|------------------|-----------------|
|                                           | Absent (n =14)              | Present (n = 14) |                 |
| Age (years)                               | 32.4 ± 3.3                  | 32.4 ± 3.8       | 0.926           |
| Nulliparity                               | 42.9% (6)                   | 50.0% (7)        | 0.705           |
| Gestational age at sampling (weeks)       | 32.4 ± 1.4                  | 31.8 ± 1.5       | 0.221           |
| Gestational age at delivery (weeks)       | 32.5 ± 1.3                  | 31.9 ± 1.6       | 0.357           |
| Use of antibiotics                        | 92.9% (13)                  | 100% (14)        | 1.000           |
| Use of tocolytics                         | 50.0% (7/14)                | 57.1% (8/14)     | 0.705           |
| Use of corticosteroids                    | 85.7% (12/14)               | 85.7% (12/14)    | 1.000           |
| Funisitis                                 | 0% (0)                      | 42.9% (6)        | 0.016           |
| Data are given as the mean ± SD or % (n). |                             |                  |                 |
